# Supplementary material
Source: publisher figshare collection journal article supplement (https://tandf.figshare.com/articles/dataset/_/14363629)
Supplement: Supplementary file 1 [file 1]

## Sheet: Information
Supplemental material 2 - BURs Adherence Index (February 18th, 2020)
This file is organised in two tabs: Tab A. Non LDC nor SIDS; and Tab B. LDC and/or SIDS. Each of these tabs presents the (1) data source; (2) scorecard; (3) coding results; (4) adherence score calculation; and (5) summary table respectively for the BURs of those non-Annex I Parties that do not have the LDC nor SIDS status and for the BURs of those non-Annex I Parties that have the LDC and/or SIDS…

## Sheet: A. Non LDC nor SIDS
BURs Adherence Index – Non-Annex I Parties (non LDC nor SIDS)
1. Data source
Summary reports on the technical analysis of BUR1: https://unfccc.int/ICA-cycle1
Summary reports on the technical analysis of BUR2: https://unfccc.int/ICA-cycle2
Summary reports on the technical analysis of BUR3: https://unfccc.int/process-and-meetings/bodies/constituted-bodies/consultative-group-of-experts-cge/cge-training-materials/international-consultation-and-analysis/international-consultation-and-analysis-outcome/international-consultation-and-analysis-outcome-cycle-3
2. Scorecard used to construct the Adherence Index of each section of a BUR
	Gradation by the technical teams of experts	Score
Timeliness	Submitted on time (i.e., by December 2014 for the first BUR; and every two years for subsequent BURs)	1
	Late submission	0
Extent to which the mandatory elements of information are included	Yes	1
	Partly	0.5
	No	0
	BUR not submitted	7
	BUR submitted but not yet analysed	9
3. Coding results
		Albania			Algeria			Andorra			Argentina			Armenia			Azerbaijan			Bolivia			Bosnia and Herzegovina			Botswana			Brazil			Brunei Darussalam			Cameroon			Chile			China			Colombia			Congo
		BUR1	BUR2	BUR3	BUR1	BUR2	BUR3	BUR1	BUR2	BUR3	BUR1	BUR2	BUR3	BUR1	BUR2	BUR3	BUR1	BUR2	BUR3	BUR1	BUR2	BUR3	BUR1	BUR2	BUR3	BUR1	BUR2	BUR3	BUR1	BUR2	BUR3	BUR1	BUR2	BUR3	BUR1	BUR2	BUR3	BUR1	BUR2	BUR3	BUR1	BUR2	BUR3	BUR1	BUR2	BUR3	BUR1	BUR2	BUR3
	Timeliness (Decision 2/CP.17, paragraph 41(a);(f))	7	7	7	7	7	7	1	0	9	0	1	9	0	0	7	0	0	7	7	7	7	0	0	7	9	7	7	1	0	9	7	7	7	7	7	7	1	1	1	0	9	7	0	0	7	7	7	7
National GHG inventory report	Decision 2/CP.17, paragraph 41(g)	7	7	7	7	7	7	1	1	9	0	1	9	1	1	7	0.5	0	7	7	7	7	1	1	7	9	7	7	1	0	9	7	7	7	7	7	7	1	1	1	1	9	7	1	1	7	7	7	7
	Decision 17/CP.8, annex, paragraph 14(a)	7	7	7	7	7	7	1	1	9	1	1	9	1	1	7	1	1	7	7	7	7	1	1	7	9	7	7	1	1	9	7	7	7	7	7	7	1	1	1	1	9	7	1	1	7	7	7	7
	Decision 17/CP.8, annex, paragraph 14(b)	7	7	7	7	7	7	1	1	9	1	1	9	1	1	7	1	1	7	7	7	7	1	1	7	9	7	7	1	1	9	7	7	7	7	7	7	1	1	1	1	9	7	1	1	7	7	7	7
	Decision 17/CP.8, annex, paragraph 14(c)	7	7	7	7	7	7	1	1	9	1	1	9	1	1	7	1	1	7	7	7	7	1	1	7	9	7	7	1	1	9	7	7	7	7	7	7	1	1	1	1	9	7	1	1	7	7	7	7
Information on mitigation actions	Decision 2/CP.17, annex III, paragraph 12(a)	7	7	7	7	7	7	1	1	9	0.5	0.5	9	1	0.5	7	0.5	0.5	7	7	7	7	0.5	0.5	7	9	7	7	1	1	9	7	7	7	7	7	7	0.5	1	0.5	1	9	7	0.5	1	7	7	7	7
	Decision 2/CP.17, annex III, paragraph 12(b)(i)	7	7	7	7	7	7	0	0.5	9	0	0	9	0.5	1	7	0.5	0	7	7	7	7	0.5	0.5	7	9	7	7	1	0.5	9	7	7	7	7	7	7	0.5	1	0.5	1	9	7	0.5	1	7	7	7	7
	Decision 2/CP.17, annex III, paragraph 12(b)(ii)	7	7	7	7	7	7	0.5	1	9	0	0	9	0.5	1	7	0.5	0	7	7	7	7	1	0.5	7	9	7	7	1	0.5	9	7	7	7	7	7	7	0.5	1	0.5	1	9	7	0.5	1	7	7	7	7
	Decision 2/CP.17, annex III, paragraph 12(c)(i)	7	7	7	7	7	7	1	1	9	1	1	9	1	1	7	1	0.5	7	7	7	7	1	1	7	9	7	7	1	1	9	7	7	7	7	7	7	1	1	1	1	9	7	1	1	7	7	7	7
	Decision 2/CP.17, annex III, paragraph 12(c)(ii)	7	7	7	7	7	7	1	1	9	0.5	1	9	1	1	7	1	0.5	7	7	7	7	0.5	1	7	9	7	7	1	1	9	7	7	7	7	7	7	1	1	0.5	1	9	7	1	1	7	7	7	7
	Decision 2/CP.17, annex III, paragraph 12(d)(i)	7	7	7	7	7	7	1	1	9	0	1	9	1	1	7	0.5	0.5	7	7	7	7	0.5	1	7	9	7	7	1	1	9	7	7	7	7	7	7	1	1	0.5	1	9	7	1	1	7	7	7	7
	Decision 2/CP.17, annex III, paragraph 12(d)(ii)	7	7	7	7	7	7	1	0.5	9	0	1	9	1	1	7	1	0.5	7	7	7	7	0.5	1	7	9	7	7	1	1	9	7	7	7	7	7	7	1	0.5	0.5	1	9	7	1	1	7	7	7	7
	Decision 2/CP.17, annex III, paragraph 12(d)(iii)	7	7	7	7	7	7	0.5	1	9	0	0.5	9	1	1	7	0.5	0.5	7	7	7	7	0.5	1	7	9	7	7	1	1	9	7	7	7	7	7	7	1	1	0.5	1	9	7	1	1	7	7	7	7
	Decision 2/CP.17, annex III, paragraph 12(e)	7	7	7	7	7	7	0	0	9	0	1	9	1	1	7	1	0	7	7	7	7	0	1	7	9	7	7	1	1	9	7	7	7	7	7	7	1	1	1	1	9	7	1	1	7	7	7	7
4. Adherence score calculation
		Albania			Algeria			Andorra			Argentina			Armenia			Azerbaijan			Bolivia			Bosnia and Herzegovina			Botswana			Brazil			Brunei Darussalam			Cameroon			Chile			China			Colombia			Congo
		BUR1	BUR2	BUR3	BUR1	BUR2	BUR3	BUR1	BUR2	BUR3	BUR1	BUR2	BUR3	BUR1	BUR2	BUR3	BUR1	BUR2	BUR3	BUR1	BUR2	BUR3	BUR1	BUR2	BUR3	BUR1	BUR2	BUR3	BUR1	BUR2	BUR3	BUR1	BUR2	BUR3	BUR1	BUR2	BUR3	BUR1	BUR2	BUR3	BUR1	BUR2	BUR3	BUR1	BUR2	BUR3	BUR1	BUR2	BUR3
Score for the section 'National GHG inventory report'								100	80		75	100		100	80		87.5	60					100	80					100	60								100	100	100	100			100	80
Score for the section 'Information on mitigation actions'								66.6667	62.2222		22.2222	73.3333		88.8889	75.5556		72.2222	26.6667					55.5556	66.6667					100	71.1111								83.3333	95.5556	68.8889	100			83.3333	80
Adherence Index								83.3333	71.1111		48.6111	86.6667		94.4444	77.7778		79.8611	43.3333					77.7778	73.3333					100	65.5556								91.6667	97.7778	84.4444	100			91.6667	80
5. Summary table
		Overall adherence score				Adherence score per section of the BURs
						National GHG inventory report				Information on mitigation actions
		BUR1	BUR2	BUR3	Average	BUR1	BUR2	BUR3	Average	BUR1	BUR2	BUR3	Average
Albania
Algeria
Andorra		83	71		77	100	80		90	67	62		64.5
Argentina		49	87		68	75	100		87.5	22	73		47.5
Armenia		94	78		86	100	80		90	89	76		82.5
Azerbaijan		80	43		61.5	88	60		74	72	27		49.5
Bolivia
Bosnia and Herzegovina		78	73		75.5	100	80		90	56	67		61.5
Botswana
Brazil		100	66		83	100	60		80	100	71		85.5
Brunei Darussalam
Cameroon
Chile		92	98	84	91.3333	100	100	100	100	83	96	69	82.6667
China		100			100	100			100	100			100
Colombia		92	80		86	100	80		90	83	80		81.5
Congo
Costa Rica		78			78	100			100	56			56
Cote d'Ivoire		72			72	100			100	44			44
Cyprus
Democratic People's Republic of Korea
Ecuador		74			74	75			75	72			72
Egypt
El Salvador		69			69	100			100	39			39
Equatorial Guinea
Gabon
Georgia		83			83	100			100	67			67
Ghana		100	80		90	100	80		90	100	80		90
Guatemala
Honduras
India		65	100		82.5	75	100		87.5	56	100		78
Indonesia		81	74		77.5	100	80		90	61	69		65
Iran
Iraq
Israel		83			83	100			100	67			67
Jordan		71			71	75			75	67			67
Kazakhstan
Kenya
Kuwait
Kyrgyzstan
Lebanon		89	96		92.5	100	100		100	78	91		84.5
Libya
Malaysia		88	100		94	75	100		87.5	100	100		100
Mexico		66	70		68	88	60		74	44	80		62
Mongolia		94			94	100			100	89			89
Montenegro		89	62		75.5	100	80		90	78	44		61
Morocco		97			97	100			100	94			94
Namibia		97	89	57	81	100	100	60	86.6667	94	78	53	75
Nicaragua
Nigeria		89			89	100			100	78			78
North Macedonia		81	73		77	100	80		90	61	73		67
Oman (Sultanate of)
Pakistan
Palestine
Panama		54			54	75			75	33			33
Paraguay		64	49		56.5	100	80		90	28	18		23
Peru		68			68	100			100	36			36
Philippines
Qatar
Republic of Korea		60	67		63.5	75	80		77.5	44	53		48.5
Republic of Moldova		100			100	100			100	100			100
San Marino
Saudi Arabia		65			65	75			75	56			56
Serbia		97			97	100			100	94			94
South Africa		50	48		49	50	30		40	50	67		58.5
Sri Lanka
Swaziland
Syrian Arab Republic
Tajikistan
Thailand		89	84		86.5	100	100		100	78	69		73.5
Tunisia		89	87		88	100	100		100	78	73		75.5
Turkmenistan
United Arab Emirates
Uruguay		72	71		71.5	88	80		84	56	62		59
Uzbekistan
Venezuela (Bolivarian Republic of)
Viet Nam		71	78		74.5	75	80		77.5	67	76		71.5
Zimbabwe
Average		80	76	71	78.7458	92	82	80	89.1542	68	70	61	68.4792
[truncated: 183 more columns]

## Sheet: B. LDC and-or SIDS
BURs Adherence Index – Non-Annex I Parties (LDC and/or SIDS)
1. Data source
Summary reports on the technical analysis of BUR1: https://unfccc.int/ICA-cycle1
Summary reports on the technical analysis of BUR2: https://unfccc.int/ICA-cycle2
Summary reports on the technical analysis of BUR3: https://unfccc.int/process-and-meetings/bodies/constituted-bodies/consultative-group-of-experts-cge/cge-training-materials/international-consultation-and-analysis/international-consultation-and-analysis-outcome/international-consultation-and-analysis-outcome-cycle-3
2. Scorecard used to construct the Adherence Index of each section of a BUR
	Gradation by the technical teams of experts	Score
Timeliness	Submitted on time (i.e., by December 2014 for the first BUR; and every two years for subsequent BURs)	1
	Late submission	0
Extent to which the mandatory elements of information are included	Yes	1
	Partly	0.5
	No	0
	BUR not submitted	7
	BUR submitted but not yet analysed	9
3. Coding results
		Afghanistan			Angola			Antiagua and Barbuda			Bahamas			Bahrain			Bangladesh			Barbados			Belize			Benin			Bhutan			Burkina Faso			Burundi			Cabo Verde			Cambodia			Central African Republic			Chad
		BUR1	BUR2	BUR3	BUR1	BUR2	BUR3	BUR1	BUR2	BUR3	BUR1	BUR2	BUR3	BUR1	BUR2	BUR3	BUR1	BUR2	BUR3	BUR1	BUR2	BUR3	BUR1	BUR2	BUR3	BUR1	BUR2	BUR3	BUR1	BUR2	BUR3	BUR1	BUR2	BUR3	BUR1	BUR2	BUR3	BUR1	BUR2	BUR3	BUR1	BUR2	BUR3	BUR1	BUR2	BUR3	BUR1	BUR2	BUR3
	Timeliness (Decision 2/CP.17, paragraph 41(a);(f))	9	7	7	7	7	7	7	7	7	7	7	7	7	7	7	7	7	7	7	7	7	7	7	7	9	7	7	7	7	7	7	7	7	7	7	7	7	7	7	7	7	7	7	7	7	7	7	7
National GHG inventory report	Decision 2/CP.17, paragraph 41(g)	9	7	7	7	7	7	7	7	7	7	7	7	7	7	7	7	7	7	7	7	7	7	7	7	9	7	7	7	7	7	7	7	7	7	7	7	7	7	7	7	7	7	7	7	7	7	7	7
	Decision 17/CP.8, annex, paragraph 14(a)	9	7	7	7	7	7	7	7	7	7	7	7	7	7	7	7	7	7	7	7	7	7	7	7	9	7	7	7	7	7	7	7	7	7	7	7	7	7	7	7	7	7	7	7	7	7	7	7
	Decision 17/CP.8, annex, paragraph 14(b)	9	7	7	7	7	7	7	7	7	7	7	7	7	7	7	7	7	7	7	7	7	7	7	7	9	7	7	7	7	7	7	7	7	7	7	7	7	7	7	7	7	7	7	7	7	7	7	7
	Decision 17/CP.8, annex, paragraph 14(c)	9	7	7	7	7	7	7	7	7	7	7	7	7	7	7	7	7	7	7	7	7	7	7	7	9	7	7	7	7	7	7	7	7	7	7	7	7	7	7	7	7	7	7	7	7	7	7	7
Information on mitigation actions	Decision 2/CP.17, annex III, paragraph 12(a)	9	7	7	7	7	7	7	7	7	7	7	7	7	7	7	7	7	7	7	7	7	7	7	7	9	7	7	7	7	7	7	7	7	7	7	7	7	7	7	7	7	7	7	7	7	7	7	7
	Decision 2/CP.17, annex III, paragraph 12(b)(i)	9	7	7	7	7	7	7	7	7	7	7	7	7	7	7	7	7	7	7	7	7	7	7	7	9	7	7	7	7	7	7	7	7	7	7	7	7	7	7	7	7	7	7	7	7	7	7	7
	Decision 2/CP.17, annex III, paragraph 12(b)(ii)	9	7	7	7	7	7	7	7	7	7	7	7	7	7	7	7	7	7	7	7	7	7	7	7	9	7	7	7	7	7	7	7	7	7	7	7	7	7	7	7	7	7	7	7	7	7	7	7
	Decision 2/CP.17, annex III, paragraph 12(c)(i)	9	7	7	7	7	7	7	7	7	7	7	7	7	7	7	7	7	7	7	7	7	7	7	7	9	7	7	7	7	7	7	7	7	7	7	7	7	7	7	7	7	7	7	7	7	7	7	7
	Decision 2/CP.17, annex III, paragraph 12(c)(ii)	9	7	7	7	7	7	7	7	7	7	7	7	7	7	7	7	7	7	7	7	7	7	7	7	9	7	7	7	7	7	7	7	7	7	7	7	7	7	7	7	7	7	7	7	7	7	7	7
	Decision 2/CP.17, annex III, paragraph 12(d)(i)	9	7	7	7	7	7	7	7	7	7	7	7	7	7	7	7	7	7	7	7	7	7	7	7	9	7	7	7	7	7	7	7	7	7	7	7	7	7	7	7	7	7	7	7	7	7	7	7
	Decision 2/CP.17, annex III, paragraph 12(d)(ii)	9	7	7	7	7	7	7	7	7	7	7	7	7	7	7	7	7	7	7	7	7	7	7	7	9	7	7	7	7	7	7	7	7	7	7	7	7	7	7	7	7	7	7	7	7	7	7	7
	Decision 2/CP.17, annex III, paragraph 12(d)(iii)	9	7	7	7	7	7	7	7	7	7	7	7	7	7	7	7	7	7	7	7	7	7	7	7	9	7	7	7	7	7	7	7	7	7	7	7	7	7	7	7	7	7	7	7	7	7	7	7
	Decision 2/CP.17, annex III, paragraph 12(e)	9	7	7	7	7	7	7	7	7	7	7	7	7	7	7	7	7	7	7	7	7	7	7	7	9	7	7	7	7	7	7	7	7	7	7	7	7	7	7	7	7	7	7	7	7	7	7	7
4. Adherence score calculation
		Afghanistan			Angola			Antiagua and Barbuda			Bahamas			Bahrain			Bangladesh			Barbados			Belize			Benin			Bhutan			Burkina Faso			Burundi			Cabo Verde			Cambodia			Central African Republic			Chad
		BUR1	BUR2	BUR3	BUR1	BUR2	BUR3	BUR1	BUR2	BUR3	BUR1	BUR2	BUR3	BUR1	BUR2	BUR3	BUR1	BUR2	BUR3	BUR1	BUR2	BUR3	BUR1	BUR2	BUR3	BUR1	BUR2	BUR3	BUR1	BUR2	BUR3	BUR1	BUR2	BUR3	BUR1	BUR2	BUR3	BUR1	BUR2	BUR3	BUR1	BUR2	BUR3	BUR1	BUR2	BUR3	BUR1	BUR2	BUR3
Score for the section 'National GHG inventory report'
Score for the section 'Information on mitigation actions'
Overal Adherence Score
5. Summary table
		Overall adherence score				Adherence score per section of the BURs
						National GHG inventory report				Information on mitigation actions
		BUR1	BUR2	BUR3	Average	BUR1	BUR2	BUR3	Average	BUR1	BUR2	BUR3	Average
Afghanistan
Angola
Antiagua and Barbuda
Bahamas
Bahrain
Bangladesh
Barbados
Belize
Benin
Bhutan
Burkina Faso
Burundi
Cabo Verde
Cambodia
Central African Republic
Chad
Comoros
Congo
Cook Islands
Cuba
Democratic Republic of the Congo
Djibouti
Dominica
Dominican Republic
Eritrea
Ethiopia
Fiji
Gambia
Grenada
Guinea
Guinea-Bissau
Guyana
Haiti
Jamaica		78			78	100			100	56			56
Kiribati
Lao People's Democratic Republic
Lesotho
Liberia
Madagascar
Malawi
Maldives
Mali
Marshall Islands
Mauritania		89			89	100			100	78			78
Mauritius
Micronesia
Mozambique
Myanmar
Nauru
Nepal
Niger
Niue
Palau
Papua New Guinea
Rwanda
Saint Kitts and Nevis
Saint Lucia
Saint Vincent and Grenadines
Samoa
Sao Tomé and Principe
Senegal
Seychelles
Sierra Leone
Singapore		100	100	88	96	100	100	75	91.6667	100	100	100	100
Solomon Islands
Somalia
South Sudan
Sudan
Suriname
Timor-Leste
Togo		83			83	100			100	67			67
Tonga
Trinidad and Tobago
Tuvalu
Uganda
United Republic of Tanzania
Vanuatu
Yemen
Zambia
Average		87.5	100	88	86.5	100	100	75	97.9167	75.25	100	100	75.25
[truncated: 189 more columns]
